# Supplementary material
Source: publisher figshare collection journal article supplement (https://frontiersin.figshare.com/ndownloader/files/22692767)
Supplement: Supplementary file [file 22692767]

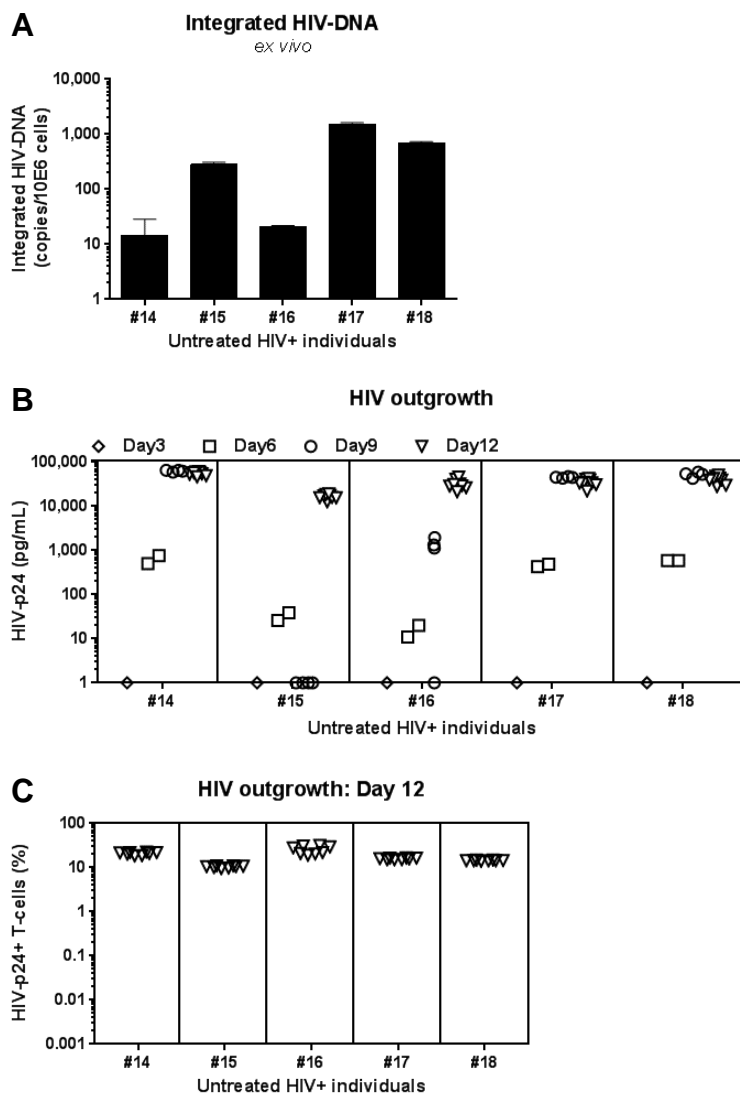

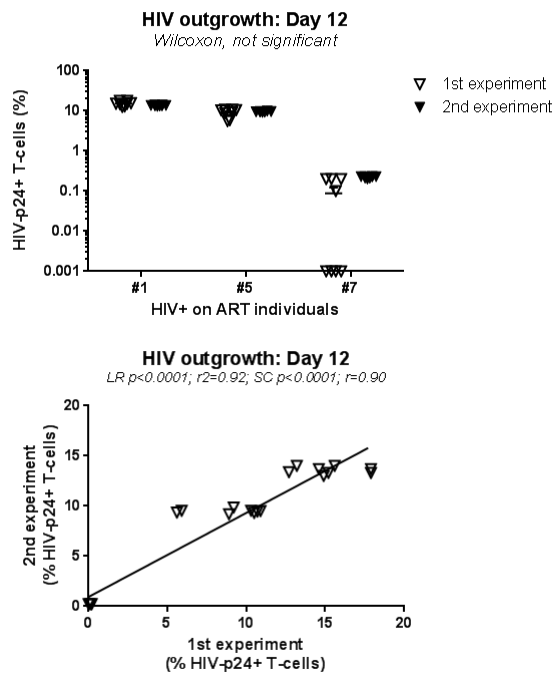

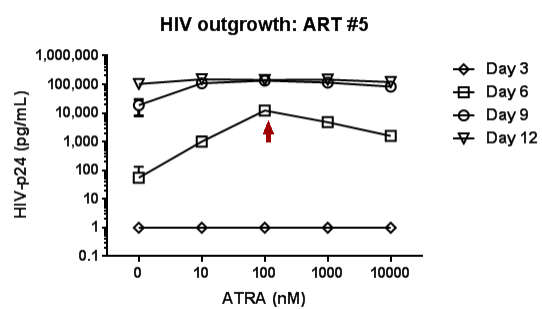

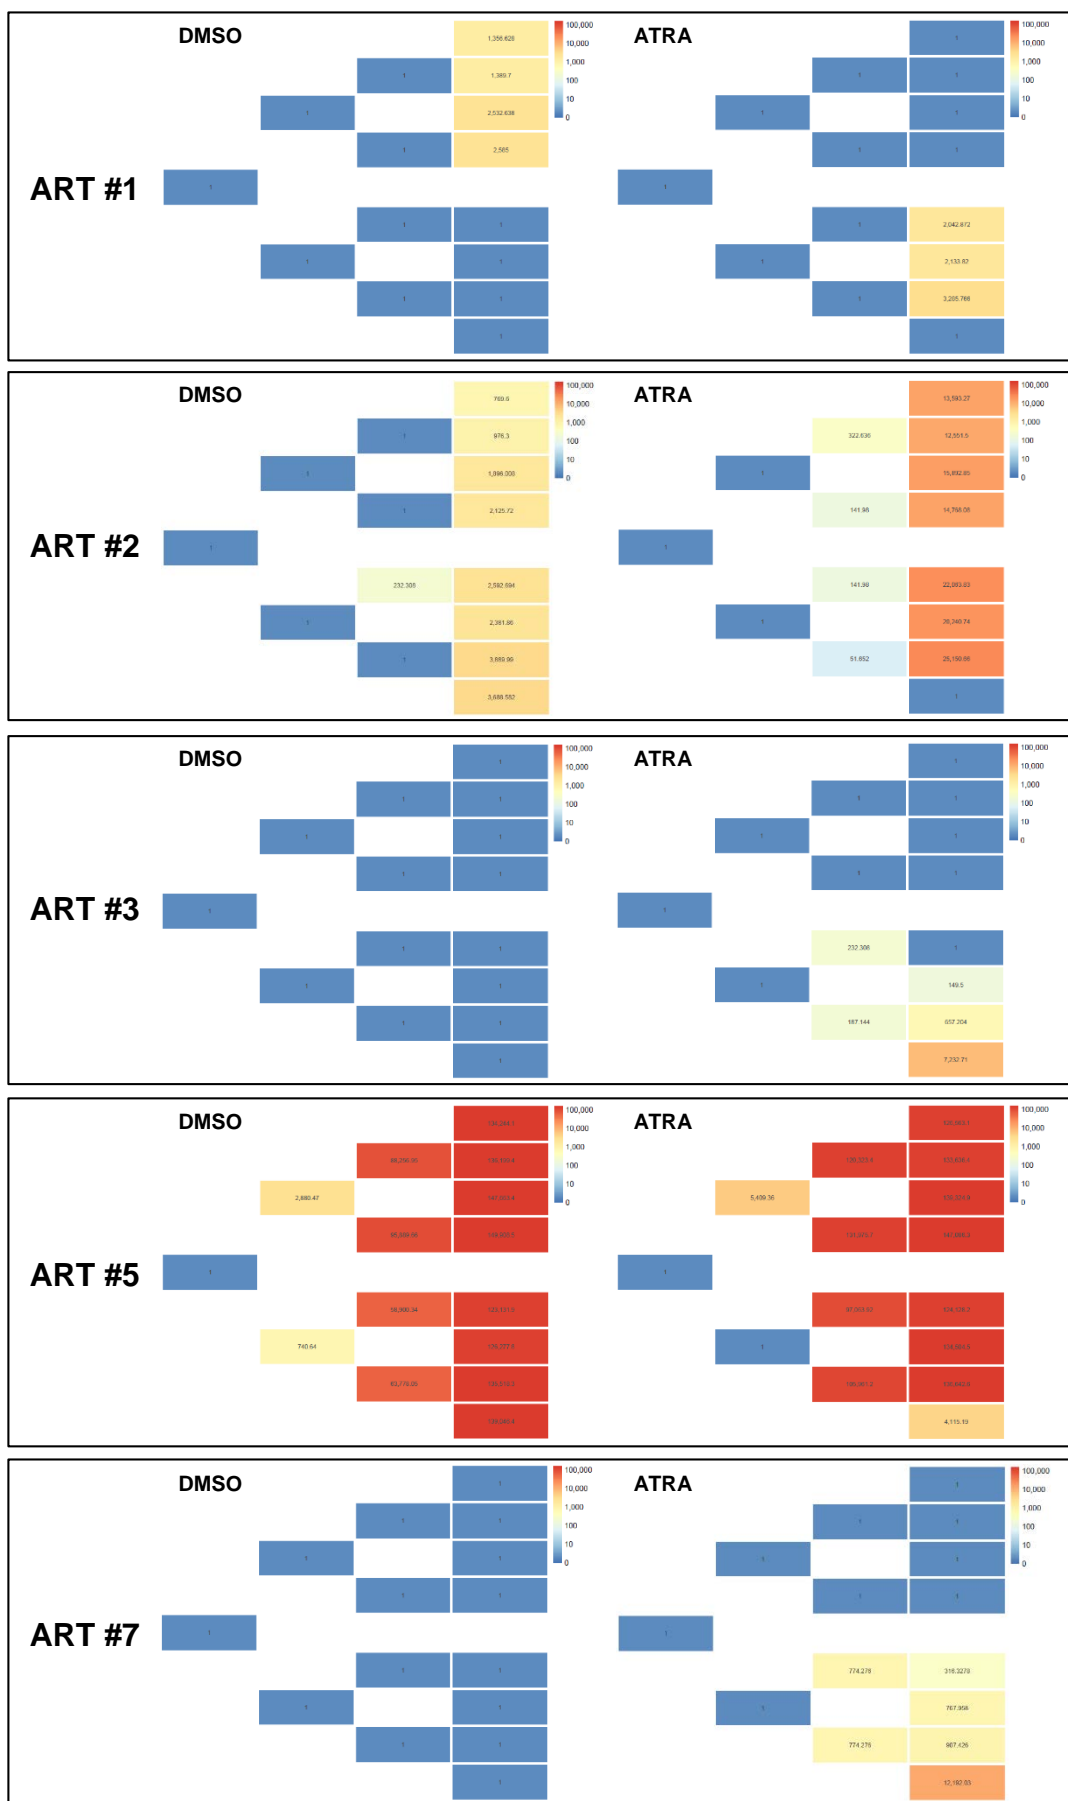

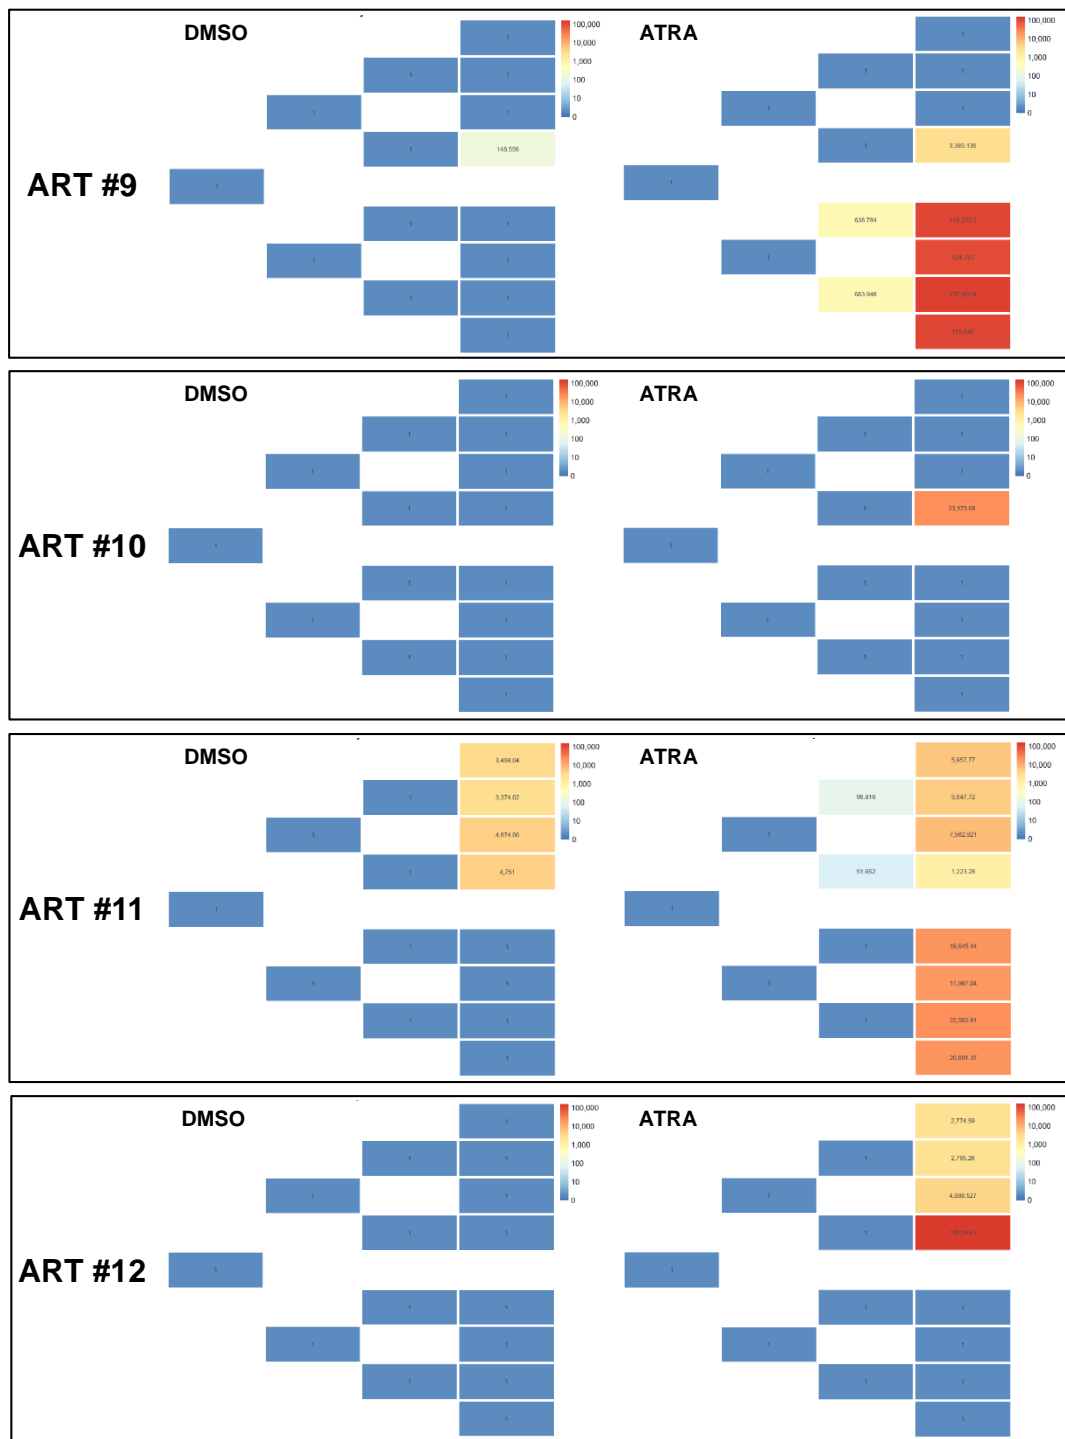

## A. HIV-p24 ELISA quantification – HIV+ART #12

| Medium                                      |                                        |        |                                             |                     |                                        | ATRA                                        |            |                     |                                             |        |            |
|---------------------------------------------|----------------------------------------|--------|---------------------------------------------|---------------------|----------------------------------------|---------------------------------------------|------------|---------------------|---------------------------------------------|--------|------------|
| 48-well plate: 1x10 <sup>5</sup> cells/well |                                        |        | 96-well plate: 2x10 <sup>5</sup> cells/well |                     |                                        | 48-well plate: 1x10 <sup>5</sup> cells/well |            |                     | 96-well plate: 2x10 <sup>5</sup> cells/well |        |            |
| Original replicates                         | Splitting replicates (HIV-p24 [pg/ml]) |        | Positivity                                  | Original replicates | Splitting replicates (HIV-p24 [pg/ml]) |                                             | Positivity | Original replicates | Splitting replicates (HIV-p24 [pg/ml])      |        | Positivity |
|                                             | Day 9                                  | Day 12 |                                             |                     | Day 9                                  | Day 12                                      |            |                     | Day 9                                       | Day 12 |            |
| 1                                           | 0                                      | 0      | NO                                          | 1                   | 0                                      | 0                                           | NO         | 1                   | 0                                           | 0      | NO         |
|                                             | 0                                      | 0      |                                             |                     | 0                                      | 0                                           |            |                     | 0                                           | 0      |            |
|                                             | 0                                      | 0      |                                             |                     | 0                                      | 0                                           |            |                     | 0                                           | 0      |            |
|                                             | 0                                      | 0      |                                             |                     | 0                                      | 137                                         |            |                     | 0                                           | 0      |            |
| 2                                           | 0                                      | 0      | NO                                          | 2                   | 0                                      | 0                                           | NO         | 2                   | 0                                           | 0      | NO         |
|                                             | 0                                      | 0      |                                             |                     | 22                                     | 0                                           |            |                     | 0                                           | 0      |            |
|                                             | 0                                      | 0      |                                             |                     | 0                                      | 0                                           |            |                     | 0                                           | 0      |            |
|                                             | 0                                      | 0      |                                             |                     | 0                                      | 0                                           |            |                     | 0                                           | 0      |            |
| 3                                           | 0                                      | 0      | NO                                          | 3                   | 0                                      | 0                                           | NO         | 3                   | 0                                           | 0      | NO         |
|                                             | 0                                      | 0      |                                             |                     | 0                                      | 0                                           |            |                     | 31                                          | 0      |            |
|                                             | 0                                      | 0      |                                             |                     | 0                                      | 0                                           |            |                     | 0                                           | 0      |            |
|                                             | 0                                      | 0      |                                             |                     | 0                                      | 0                                           |            |                     | 0                                           | 0      |            |
| 4                                           | 0                                      | 0      | YES                                         | 4                   | 0                                      | 0                                           | NO         | 4                   | 0                                           | 0      | NO         |
|                                             | 1 708                                  | 48 601 |                                             |                     | 0                                      | 0                                           |            |                     | 0                                           | 0      |            |
|                                             | 0                                      | 32 955 |                                             |                     | 0                                      | 0                                           |            |                     | 0                                           | 0      |            |
|                                             | 2 576                                  | 33 755 |                                             |                     | 21                                     | 0                                           |            |                     | 0                                           | 0      |            |
|                                             |                                        | 34 628 |                                             | 5                   | 0                                      | 0                                           | NO         | 5                   | 0                                           | 0      | NO         |
|                                             |                                        |        |                                             |                     | 0                                      | 0                                           |            |                     | 0                                           | 0      |            |
|                                             |                                        |        |                                             |                     | 0                                      | 0                                           |            |                     | 0                                           | 0      |            |
|                                             |                                        |        |                                             |                     | 0                                      | 0                                           |            |                     | 0                                           | 0      |            |
|                                             |                                        |        |                                             | 6                   | 0                                      | 0                                           | NO         | 6                   | 0                                           | 8 000  | YES        |
|                                             |                                        |        |                                             |                     | 0                                      | 0                                           |            |                     | 0                                           | 20 254 |            |
|                                             |                                        |        |                                             |                     | 0                                      | 0                                           |            |                     | 42                                          | 5 710  |            |
|                                             |                                        |        |                                             |                     | 0                                      | 0                                           |            |                     | 0                                           | 18 740 |            |
|                                             |                                        |        |                                             |                     | 0                                      | 0                                           |            |                     | 0                                           | 0      |            |
|                                             |                                        |        |                                             |                     |                                        |                                             |            |                     |                                             |        |            |
|                                             |                                        |        |                                             |                     |                                        |                                             |            |                     |                                             |        |            |
|                                             |                                        |        |                                             |                     |                                        |                                             |            |                     |                                             |        |            |

## B. IUPM calculations

| ART# | ATRA | 1x10 <sup>6</sup> cells/well<br>(48-well plate) |                | 2x10 <sup>5</sup> cells/well<br>(96-well plate) |                | IUPM     | 95%<br>confidence interval |             |
|------|------|-------------------------------------------------|----------------|-------------------------------------------------|----------------|----------|----------------------------|-------------|
|      |      | Total wells                                     | Positive wells | Total wells                                     | Positive wells |          | lower bound                | upper bound |
| 1    | NO   | 4                                               | 0              | 6                                               | 0              | 0,133298 | *                          | *           |
| 1    | YES  | 4                                               | 1              | 6                                               | 0              | 0,213574 | 0,029972                   | 1,521894    |
| 2    | NO   | 4                                               | 3              | 6                                               | 4              | 2,616424 | 1,147623                   | 5,965091    |
| 2    | YES  | 4                                               | 4              | 6                                               | 5              | 8,969419 | 3,320795                   | 24,226273   |
| 5    | NO   | 3                                               | 2              | 6                                               | 0              | 0,980829 | 0,231885                   | 4,148714    |
| 5    | YES  | 3                                               | 3              | 6                                               | 1              | 1,856759 | 0,626763                   | 5,500567    |
| 7    | NO   | 3                                               | 1              | 8                                               | 0              | 0,245122 | 0,034358                   | 1,748771    |
| 7    | YES  | 4                                               | 3              | 8                                               | 0              | 0,767255 | 0,240628                   | 2,446435    |
| 8    | NO   | 4                                               | 0              | 8                                               | 0              | 0,123776 | *                          | *           |
| 8    | YES  | 4                                               | 1              | 8                                               | 0              | 0,196710 | 0,027621                   | 1,400933    |
| 9    | NO   | 4                                               | 1              | 6                                               | 0              | 0,213574 | 0,029972                   | 1,521894    |
| 9    | YES  | 4                                               | 0              | 6                                               | 0              | 0,133298 | *                          | *           |
| 12   | NO   | 4                                               | 1              | 6                                               | 0              | 0,213574 | 0,029972                   | 1,521894    |
| 12   | YES  | 4                                               | 2              | 6                                               | 1              | 0,755133 | 0,239146                   | 2,384426    |

ART#, ART-treated PLWH; ATRA, *all-trans* retinoic acid; IUPM, infectious units per million;

\*, 95% confidence interval below 0,576
